# Supplementary material
Source: Springer Nature journal article supplement (https://www.springermedizin.de/resource/supplementary/12913_2009_1090_MOESM2_ESM.pdf/9536326)

percent

100

80

60

40

20

0

physicians (n=629)

medical students (n=283)

$\chi^2 = 9.1$   
 $p < 0.01$

$\chi^2 = 3.4$   
 $p < 0.05$

83.7

91.6

77.8

86.7

male

female

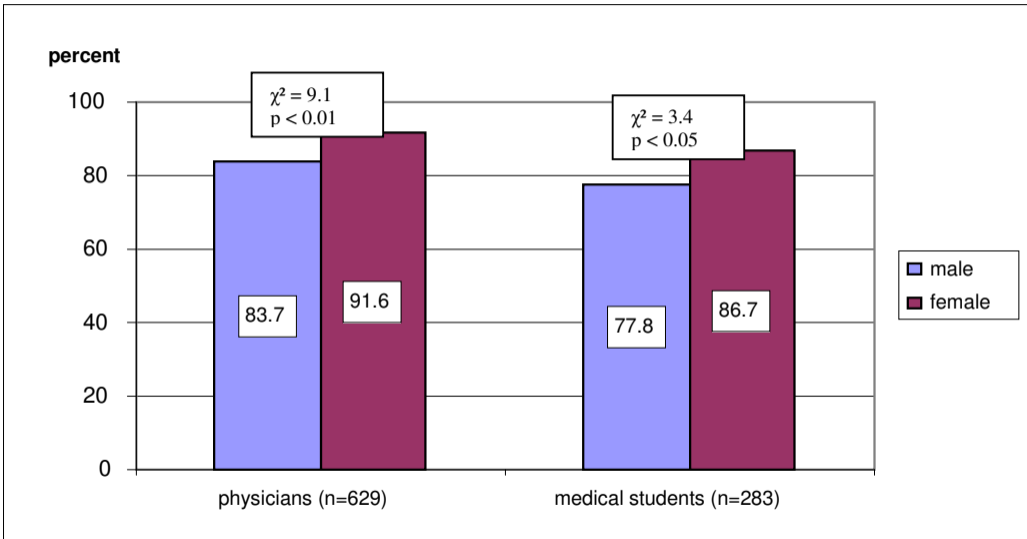

Supplement: MOESM2 [file 9536326]
